# Supplementary material
Source: PubMed Central journal article supplement (PMC3283034)

**A**  
**LNCaP**

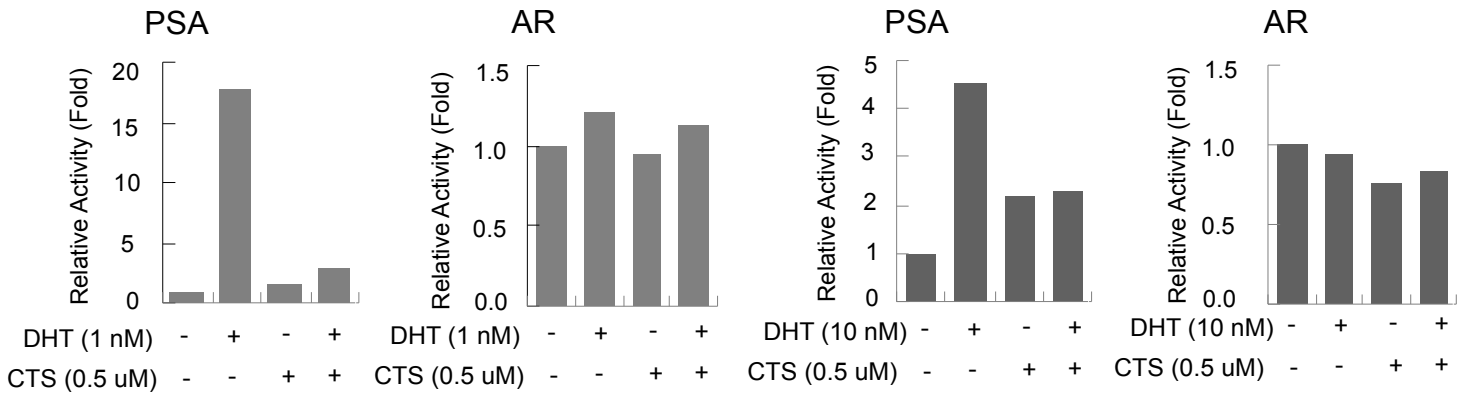

**B**  
**CWR22Rv1**

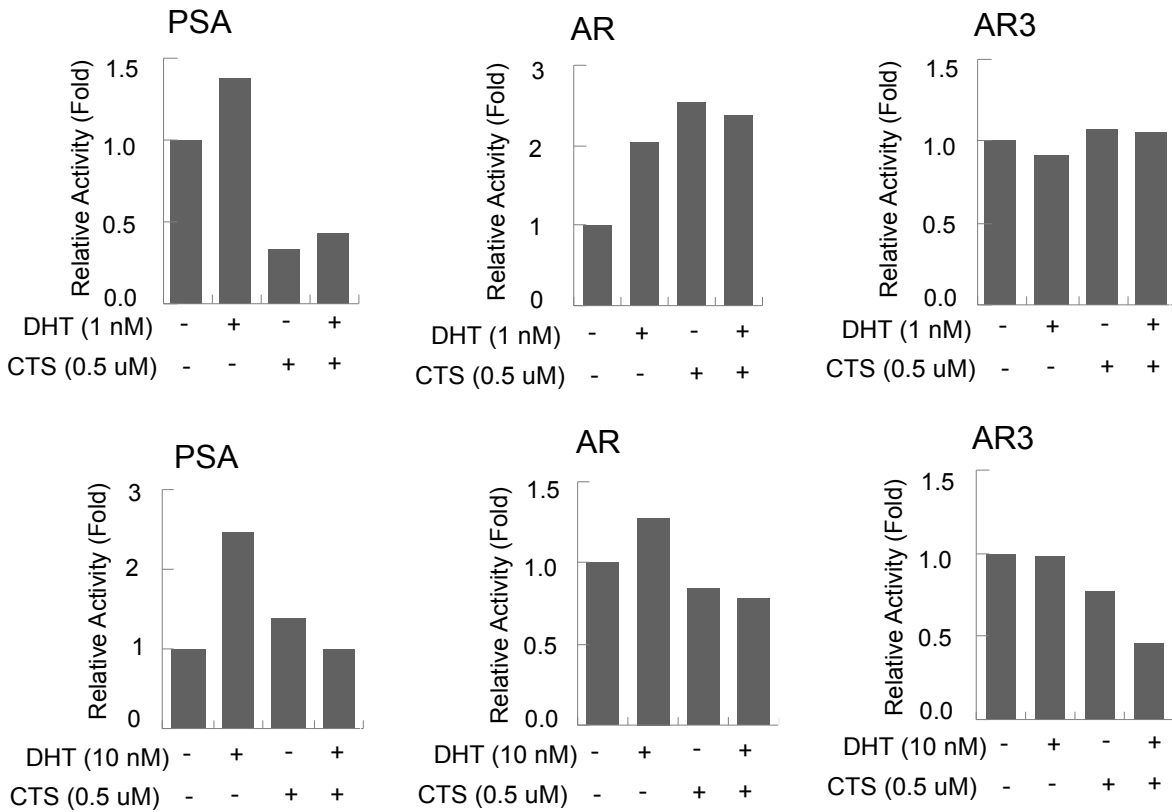

Supplement: NIHMS343593-supplement-01.pdf [file NIHMS343593-supplement-01.pdf]
